# Supplementary material for: Magnesium Oxide/Poly(l‐lactide‐co‐ε‐caprolactone) Scaffolds Loaded with Neural Morphogens Promote Spinal Cord Repair through Targeting the Calcium Influx and Neuronal Differentiation of Neural Stem Cells
Source: PubMed Central journal article supplement — Adv Healthc Mater. 2022 Jun 3;11(15):2200386. doi: 10.1002/adhm.202200386 (PMC11469078; doi:10.1002/adhm.202200386), 2022-06-03

Supporting Information

**Magnesium Oxide/Poly (L-lactide-co- $\epsilon$ -caprolactone) Scaffolds Loaded with Neural Morphogens Promote Spinal Cord Repair through Targeting the Calcium Influx and Neuronal Differentiation of Neural Stem Cells**

Jile Xie, Jiaying Li, Jinjin Ma, Meimei Li, Xingran Wang, Xinya Fu, Yanxia Ma, Huilin Yang, Bin Li\*, and Saijilafu\*

**Figure S1.** Characterization of synthesized MgO nanoparticles. A) Elemental mapping of synthesized MgO nanoparticles. B) UV absorbance curves of PUR and RA solution before and after drug loading.

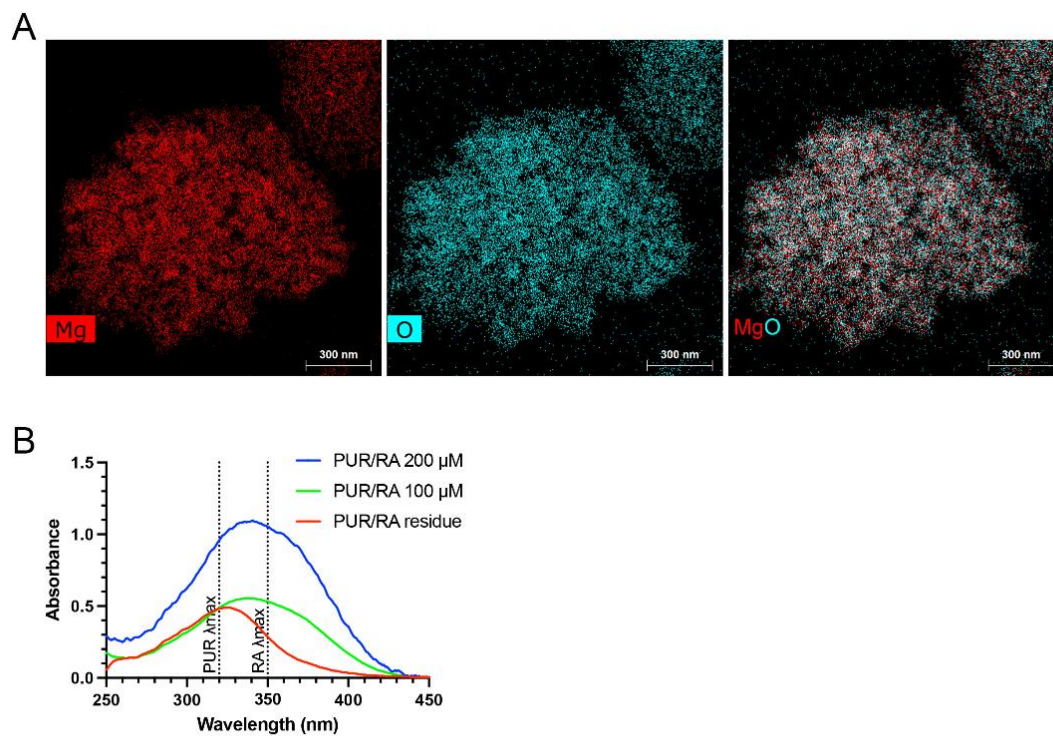

**Figure S2.** The identification of isolated NSCs.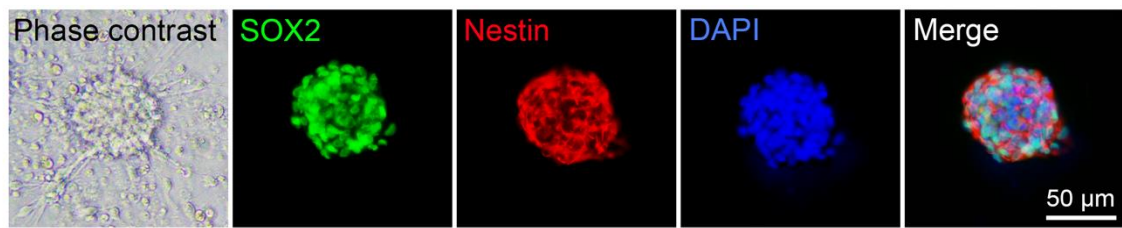

**Figure S3.** A) Enlarged images of Figure 7c. B) Enlarged images of Figure 7d. The white arrowheads indicate Tuj1 markers co-localize with DAPI-labeled nuclei.

A) Enlarged images of Figure 7c

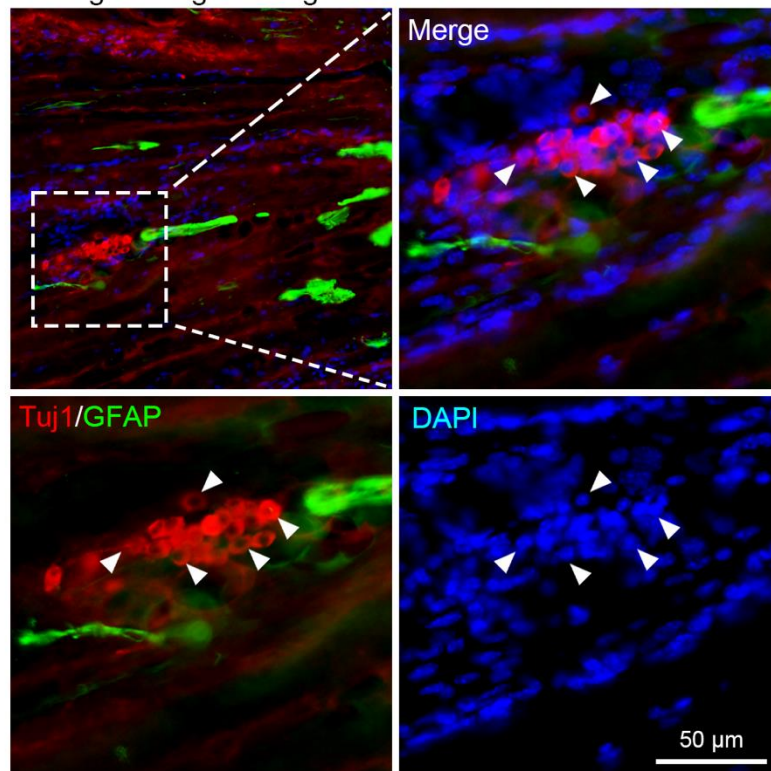

B) Enlarged images of Figure 7d

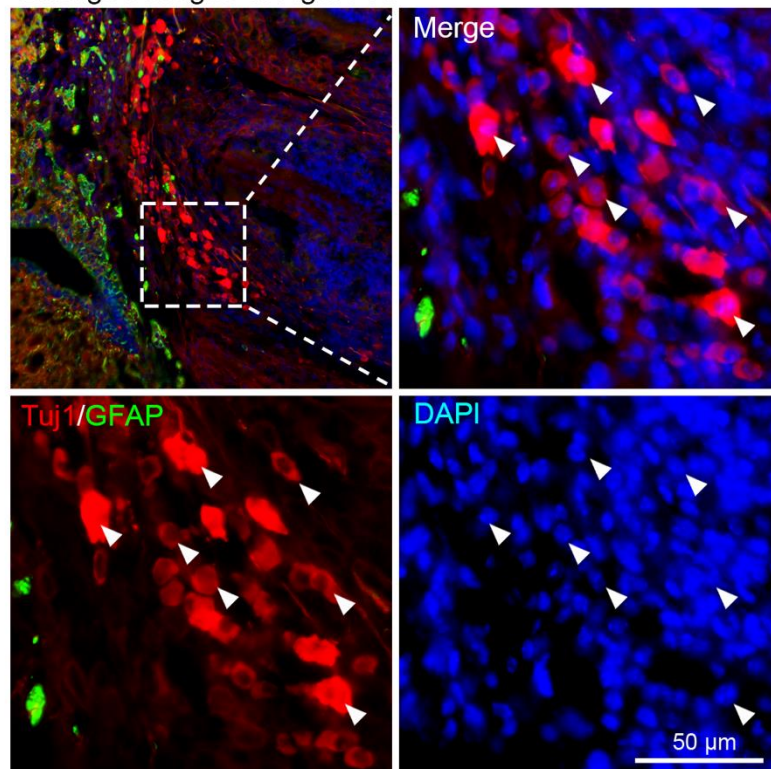



**Figure S4.** Nerve repair of MgO/PLCL+PUR/RA scaffold *in vivo*. A) The Activation of CSPG around the injury sites. B) The proliferation of CD68-labeled microglia cells around the injury site.

**A** GFAP/CS56/DAPI 8 weeks after surgery

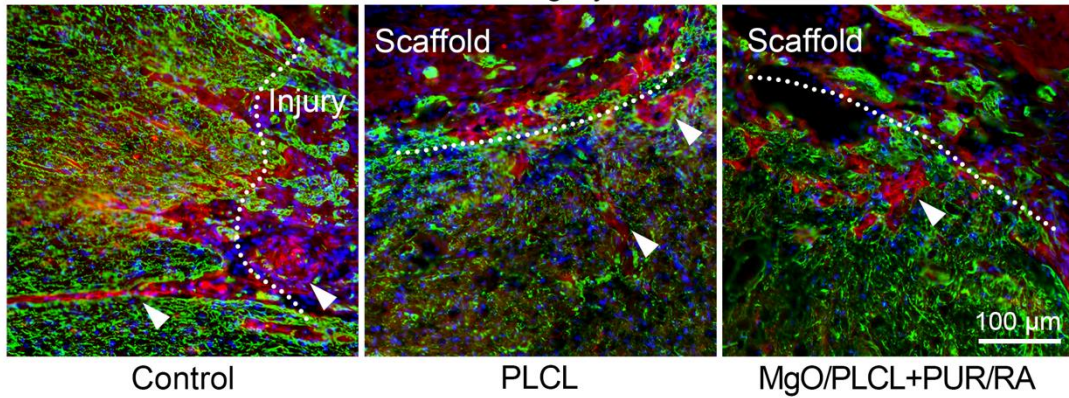

**B** CD68 8 weeks after surgery

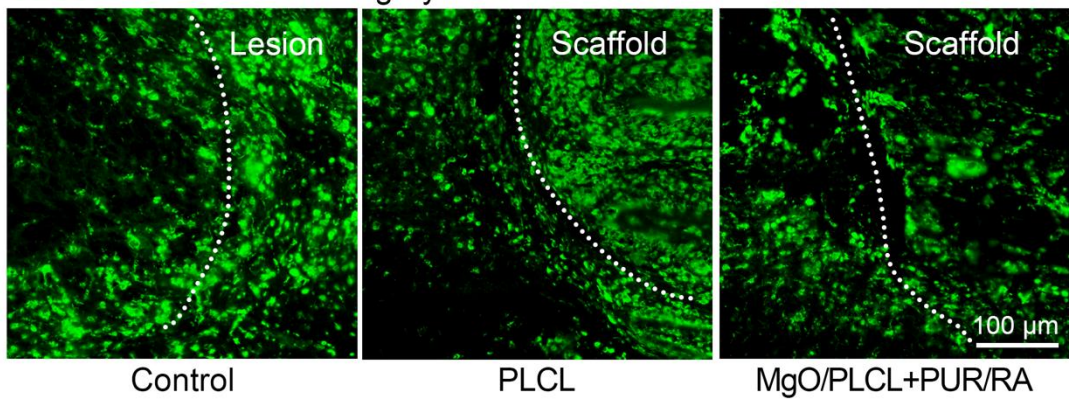

Supplement: ADHM-11-2200386-s001.pdf [file ADHM-11-2200386-s001.pdf]
